# Supplementary material for: 18Beta-Glycyrrhetinic Acid Attenuates H2O2-Induced Oxidative Damage and Apoptosis in Intestinal Epithelial Cells via Activating the PI3K/Akt Signaling Pathway
Source: MDPI journal article supplement (doi:10.3390/antiox13040468), 2024-04-16
Supplement: s1 [file antioxidants-2889724-supplementary.pdf › antioxidants-2889724-supplementary.pdf]

# **Glycyrrhetic Acid Attenuates H<sub>2</sub>O<sub>2</sub>-Induced Oxidative Damage and Apoptosis in Intestinal Epithelial Cells via Activating the PI3K/Akt Signaling Pathway**

Cui Ma<sup>a</sup>, Fuxi Wang<sup>a,d</sup>, Jiawei Zhu<sup>a</sup>, Shiyi Wang<sup>a,c</sup>, Yaqing Liu<sup>a,b</sup>, Jianfang Xu<sup>a</sup>, Qingyu Zhao<sup>a</sup>, Yuchang Qin<sup>a</sup>, Wei Si<sup>a\*</sup>, and Junmin Zhang<sup>a\*</sup>

<sup>a</sup> State Key Laboratory of Animal Nutrition and Feeding, Institute of Animal Sciences of Chinese Academy of Agricultural Sciences, Beijing, 100193, China.

<sup>b</sup> College of Animal Science and Technology, Qingdao Agricultural University, Qingdao, 266109, China.

<sup>c</sup> College of Food Science and Engineering, Qingdao Agricultural University, Qingdao, 266109, China.

<sup>d</sup> College of Animal Science and Technology, Shanxi Agricultural University, Taigu, Shanxi 030801, China

---

\* Correspondence: Dr. Wei Si, [siwei01@caas.cn](mailto:siwei01@caas.cn)

\* Correspondence: Dr. JunMin Zhang, [zhangjunmin@caas.cn](mailto:zhangjunmin@caas.cn)

**Supplementary Figure S1** Effect of hyperoxia and hydrogen peroxide ( $\text{H}_2\text{O}_2$ ) and glycyrrhethinic acid (GA) on cell viability in IPEC-J2 cells. (A) Cell viability in IPEC-J2 cells exposure to 200  $\mu\text{M}$   $\text{H}_2\text{O}_2$  for 8 h. (B) Cell viability in IPEC-J2 cells pre-treated with GA for 24 h exposure to 200  $\mu\text{M}$   $\text{H}_2\text{O}_2$  for 8 h. Data are presented as mean  $\pm$  SEM with triplicate cultures of the representative experiments. (A) Data were analyzed by unpaired T-test.  $*p < 0.05$  means significant difference between two groups.

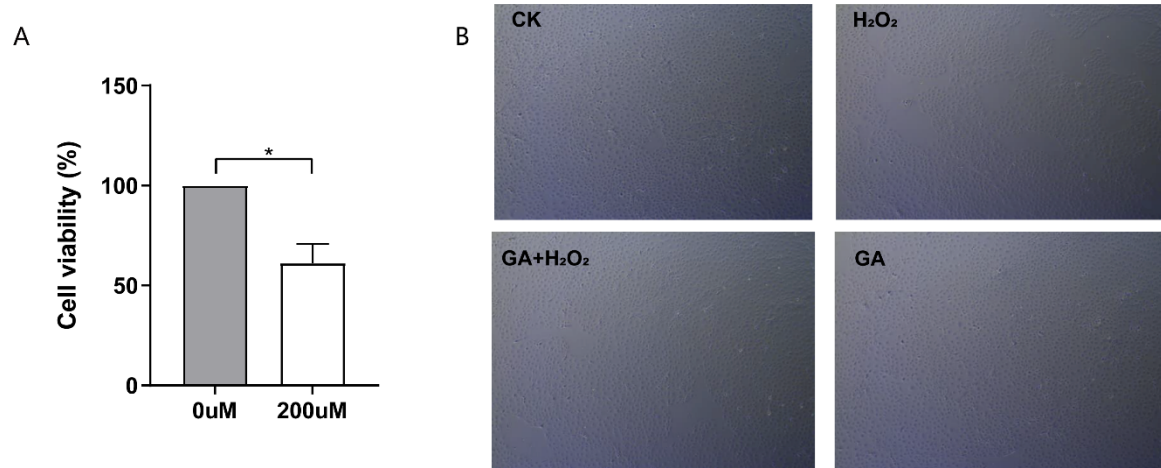

**Supplementary Figure S2** The western blot images of p-PI3K, PI3K, p-Akt, and Akt were run in parallel and left and right panels were run at different times.

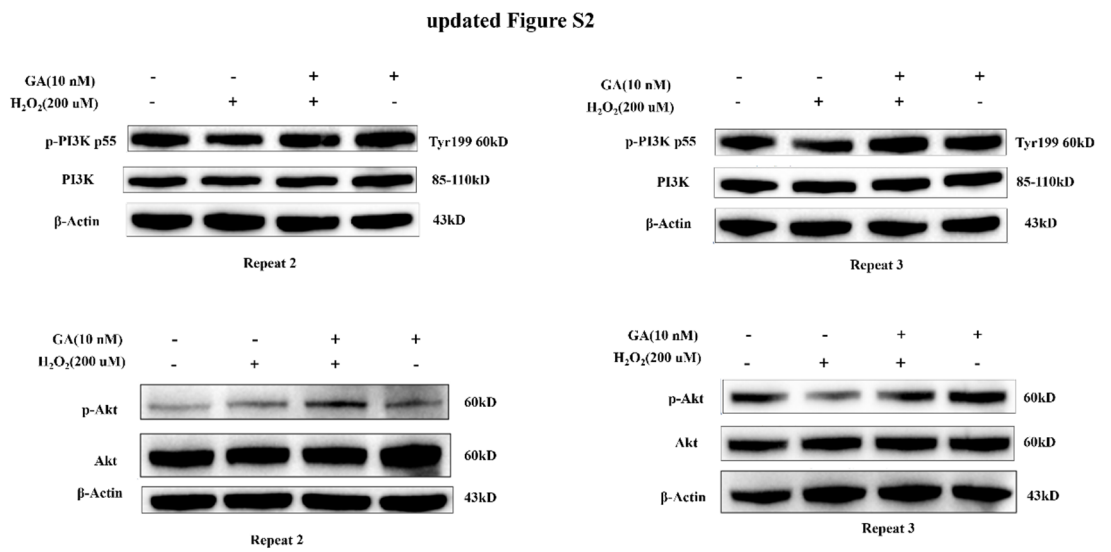

**Supplementary Figure S3** The western blot images of BCL2, BAX, p53, and Cytc were run in parallel and left and right panels were run at different times.

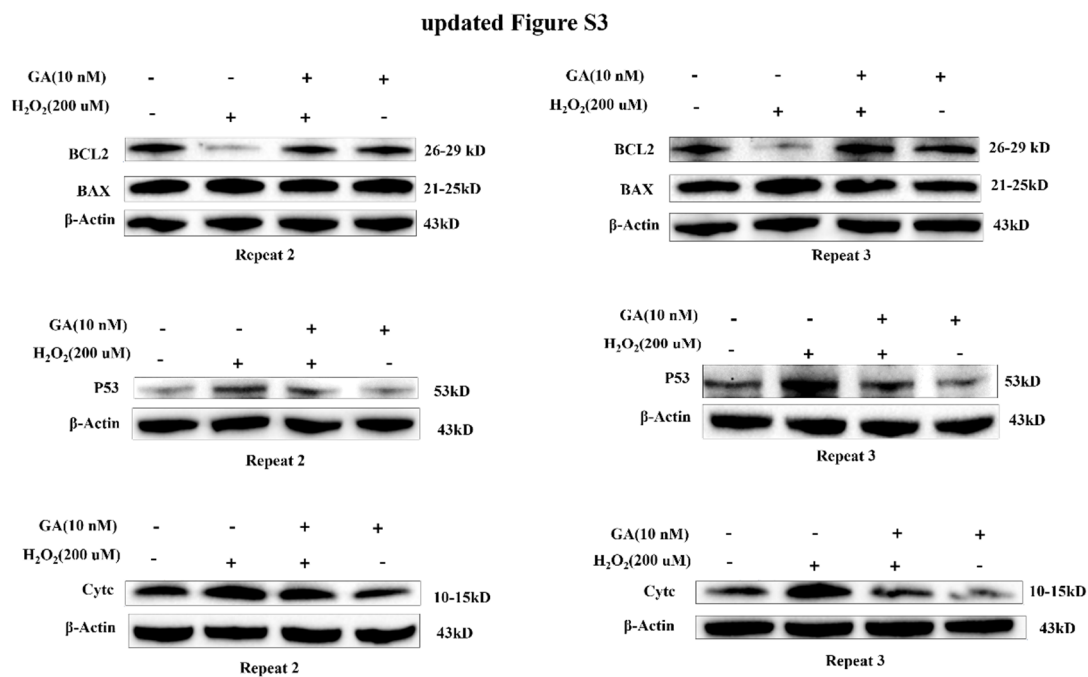

**Supplementary Table S1 Information of the commercial assay kits**

| Index    | Item number | Company                                    |
|----------|-------------|--------------------------------------------|
| MDA      | A003-1-2    | Nanjing Jiancheng Bioengineering Institute |
| SOD      | A001-1-2    | Nanjing Jiancheng Bioengineering Institute |
| GSH/GSSG | A061-2-1    | Nanjing Jiancheng Bioengineering Institute |
| CAT      | A007-1      | Nanjing Jiancheng Bioengineering Institute |

**Supplementary Table S2** The raw data of MDA level, SOD and CAT activity, and GSH/GSSG ratio

| Group                             | MDA (nmol/10 <sup>6</sup> cell) | SOD (U/10 <sup>6</sup> cell) | CAT (U/10 <sup>6</sup> cell) | GSH/GSSG |
|-----------------------------------|---------------------------------|------------------------------|------------------------------|----------|
| CK                                | 0.83                            | 8.02                         | 1.48                         | 2.66     |
| CK                                | 0.96                            | 7.56                         | 0.70                         | 2.51     |
| CK                                | 0.74                            | 3.38                         | 1.00                         | 1.57     |
| CK                                | 0.79                            | 3.47                         | 0.70                         | 2.68     |
| CK                                | 0.99                            | 8.65                         | 1.58                         | 1.51     |
| CK                                | 0.99                            | 8.56                         | 1.45                         | 1.7      |
| CK                                | 0.74                            | 3.61                         | 0.71                         | 1.55     |
| CK                                | 0.76                            | 8.54                         | 1.46                         | 2.95     |
| CK                                | 0.97                            | 3.63                         | 0.72                         | 2.55     |
| H <sub>2</sub> O <sub>2</sub>     | 1.20                            | 7.10                         | 0.65                         | 2.25     |
| H <sub>2</sub> O <sub>2</sub>     | 1.32                            | 6.65                         | 0.64                         | 2.55     |
| H <sub>2</sub> O <sub>2</sub>     | 1.27                            | 6.60                         | 0.64                         | 2.38     |
| H <sub>2</sub> O <sub>2</sub>     | 1.31                            | 7.20                         | 0.65                         | 2.47     |
| H <sub>2</sub> O <sub>2</sub>     | 1.30                            | 6.64                         | 0.64                         | 2.7      |
| H <sub>2</sub> O <sub>2</sub>     | 1.34                            | 6.60                         | 0.64                         | 2.56     |
| H <sub>2</sub> O <sub>2</sub>     | 1.34                            | 7.13                         | 0.65                         | 2.18     |
| H <sub>2</sub> O <sub>2</sub>     | 1.21                            | 7.15                         | 0.65                         | 2.64     |
| H <sub>2</sub> O <sub>2</sub>     | 1.20                            | 7.10                         | 0.64                         | 2.5      |
| GA+ H <sub>2</sub> O <sub>2</sub> | 0.99                            | 7.40                         | 2.12                         | 3.75     |
| GA+ H <sub>2</sub> O <sub>2</sub> | 1.02                            | 7.48                         | 1.60                         | 4.09     |
| GA+ H <sub>2</sub> O <sub>2</sub> | 0.95                            | 6.79                         | 2.10                         | 2.72     |
| GA+ H <sub>2</sub> O <sub>2</sub> | 1.03                            | 6.80                         | 2.18                         | 4.44     |
| GA+ H <sub>2</sub> O <sub>2</sub> | 1.03                            | 7.60                         | 1.60                         | 4.14     |
| GA+ H <sub>2</sub> O <sub>2</sub> | 1.03                            | 7.57                         | 1.64                         | 4.3      |
| GA+ H <sub>2</sub> O <sub>2</sub> | 0.95                            | 6.81                         | 2.17                         | 4.59     |
| GA+ H <sub>2</sub> O <sub>2</sub> | 1.03                            | 6.85                         | 1.60                         | 3.52     |
| GA+ H <sub>2</sub> O <sub>2</sub> | 0.97                            | 7.57                         | 2.22                         | 2.9      |
| GA                                | 0.81                            | 7.63                         | 1.49                         | 1.95     |
| GA                                | 0.89                            | 8.10                         | 2.27                         | 3.97     |
| GA                                | 0.80                            | 7.07                         | 1.12                         | 2.53     |
| GA                                | 0.81                            | 8.28                         | 1.30                         | 1.98     |
| GA                                | 0.80                            | 8.30                         | 2.50                         | 2.61     |
| GA                                | 0.90                            | 7.13                         | 2.44                         | 2.02     |
| GA                                | 0.90                            | 7.22                         | 1.15                         | 1.86     |
| GA                                | 0.91                            | 7.54                         | 1.23                         | 3.96     |
| GA                                | 0.81                            | 8.16                         | 1.27                         | 2.59     |

**Supplementary Table S3** Primer sequences of genes for quantitative real-time PCR

| Gene   | Primer sequence (5'-3')    | Accession number | Size (bp) |
|--------|----------------------------|------------------|-----------|
| GAPDH  | F: TGTCCACCTTCCAGCAGATGT   | NM_001206359.1   | 132       |
|        | R: AGCTCAGTAACAGTCCGCCTAGA |                  |           |
| iNOS   | F: GGGTCAGAGCTACCATCCTC    | XM_013981169.2   | 114       |
|        | R: CGTCCATGCAGAGAACCTTG    |                  |           |
| CP     | F: TGGAGCCAGACAATGAAGAC    | NM_001267694     | 160       |
|        | R: CATCAAAGAGGGTAGCAGGA    |                  |           |
| VIPR1  | F: CATCAGGCTGCAGCAAGATGT   | NM_214036.1      | 219       |
|        | R: CGTCCAAACCCGATGCCTTGTC  |                  |           |
| ZNF554 | F: CCGGGAACCCAGAGCCTTAT    | XM_021084174.1   | 203       |
|        | R: CAGCCACATCCTCCAAGGTT    |                  |           |
| P53    | F: CTGGCAGCAGTGAACGATCT    | NM_213824.3      | 148       |
|        | R: TGCAGGAACCCTAGACGGAA    |                  |           |
| CytC   | F: AGACTGGTCCAAACCTCCAT    | NM_001129970.1   | 190       |
|        | R: TCTCCCTTCTTCTTAATGCCAG  |                  |           |

**Supplementary Table S4** Information of primary antibodies

| Primary antibodies | Item number | Source | Dilution rate | Company        |
|--------------------|-------------|--------|---------------|----------------|
| $\beta$ -Actin     | 4967        | Rabbit | 1: 5000       | Cell Signaling |
| PI3K               | 3811S       | Rabbit | 1: 2000       | Cell Signaling |
| p-PI3K             | 4228T       | Rabbit | 1: 2000       | Cell Signaling |
| Akt                | 9272        | Rabbit | 1: 1000       | Cell Signaling |
| p-Akt              | 9271s       | Rabbit | 1: 1000       | Cell Signaling |
| Bcl2               | 12789-1-AP  | Rabbit | 1: 2000       | Proteintech    |
| Bax                | 50599-2-Ig  | Rabbit | 1: 1000       | Proteintech    |
| p53                | 9282T       | Rabbit | 1: 1000       | Cell Signaling |
| Cytochrome C       | 10993-1-AP  | Rabbit | 1: 1000       | Proteintech    |



**Supplementary Table S5** Quality of sequencing data from IPEC-J2 cells samples libraries

| Sample                               | Raw_reads | Clean_reads | Error_rate | Q20(%) | Q30(%) | GC_pct(%) |
|--------------------------------------|-----------|-------------|------------|--------|--------|-----------|
| CK-1                                 | 45743280  | 44440402    | 0.03       | 97.43  | 93.11  | 52.45     |
| CK-2                                 | 47727540  | 46627492    | 0.03       | 97.58  | 93.51  | 52.58     |
| CK-3                                 | 45913052  | 44880952    | 0.03       | 97.4   | 93.07  | 52.84     |
| H <sub>2</sub> O <sub>2</sub> -1     | 47114360  | 45846546    | 0.03       | 97.74  | 93.8   | 52.89     |
| H <sub>2</sub> O <sub>2</sub> -2     | 45827002  | 44874892    | 0.03       | 96.67  | 91.11  | 53.46     |
| H <sub>2</sub> O <sub>2</sub> -3     | 45909150  | 44394208    | 0.03       | 96.88  | 91.5   | 52.75     |
| GA+ H <sub>2</sub> O <sub>2</sub> -1 | 42174320  | 41045548    | 0.03       | 97.17  | 92.61  | 52.51     |
| GA+ H <sub>2</sub> O <sub>2</sub> -2 | 46761698  | 45710858    | 0.03       | 97.25  | 92.81  | 52.92     |
| GA+ H <sub>2</sub> O <sub>2</sub> -3 | 45659170  | 44350230    | 0.03       | 97.02  | 92.26  | 52.9      |
| GA-1                                 | 44964048  | 43955882    | 0.03       | 97.08  | 92.33  | 52.03     |
| GA-2                                 | 47970984  | 46808930    | 0.03       | 97.4   | 93.12  | 52.82     |
| GA-3                                 | 46249248  | 45065328    | 0.03       | 97.18  | 92.55  | 52.13     |
